# Supplementary material for: FOLFIRINOX in borderline resectable and locally advanced unresectable pancreatic adenocarcinoma
Source: PubMed Central journal article supplement — Ther Adv Med Oncol. 2020 Sep 16;12:1758835920953294. doi: 10.1177/1758835920953294 (PMC7498966; doi:10.1177/1758835920953294), 2020-09-16
Supplement: Supplementary_Table.pdf [file Supplementary_Table.pdf]

**Supplementary Table 1. Key safety profiles of FOLFIRINOX**

| <b>Adverse events</b>        | <b>Total n=199</b> |                  |
|------------------------------|--------------------|------------------|
|                              | <b>Grade 1-2</b>   | <b>Grade 3-4</b> |
| <b>Neutropenia</b>           | 17 (8.5%)          | 121(60.8%)       |
| <b>Febrile neutropenia</b>   |                    | 3 (1.5%)         |
| <b>Anemia</b>                | 91 (45.7%)         | 9 (4.5%)         |
| <b>Thrombocytopenia</b>      | 27 (13.6%)         | 16 (8.0%)        |
| <b>Anorexia</b>              | 2 (1.0%)           | 7 (3.5%)         |
| <b>Nausea</b>                | 4 (2.0%)           | 12 (6.0%)        |
| <b>Vomiting</b>              | 2 (1.0%)           | 8 (4.0%)         |
| <b>Diarrhea</b>              | 3 (1.5%)           | 7 (3.5%)         |
| <b>Peripheral neuropathy</b> | 2 (1.0%)           | 8 (4.0%)         |
